# Supplementary material for: A fast and scalable framework for large-scale and ultrahigh-dimensional sparse regression with application to the UK Biobank
Source: PubMed Central journal article supplement (PMC7641476; doi:10.1371/journal.pgen.1009141), 2020-10-23
Supplement: pgen.1009141.s005.pdf [file pgen.1009141.s005.pdf]

| Model | Form                | $R^2_{\text{train}}$ | $R^2_{\text{val}}$ | $R^2_{\text{test}}$ | Size    |
|-------|---------------------|----------------------|--------------------|---------------------|---------|
| (1)   | Age + Sex           | 0.0092               | 0.0089             | 0.0083              | 2       |
| (2)   | Age + Sex + 10 PCs  | 0.0104               | 0.0103             | 0.0099              | 12      |
| (3)   | (2) + Single SNP    | 0.0134               | 0.0128             | 0.0124              | 13      |
| (4)   | (2) + 10K Combined  | 0.0384               | 0.0195             | 0.0210              | 10,012  |
| (5)   | (2) + 100K Combined | 0.1307               | 0.0064             | 0.0093              | 100,012 |
| (6)   | Sequential LR       | 0.0865               | 0.0385             | 0.0395              | 2,012   |
| (7)   | Lasso               | 0.3196               | 0.1017             | 0.1052              | 26,060  |
| (8)   | Relaxed Lasso       | 0.1609               | 0.0504             | 0.0537              | 2,585   |
| (9)   | Elastic Net         | 0.4714               | 0.1121             | <b>0.1151</b>       | 83,500  |
