# Supplementary material for: A fast and scalable framework for large-scale and ultrahigh-dimensional sparse regression with application to the UK Biobank
Source: PubMed Central journal article supplement (PMC7641476; doi:10.1371/journal.pgen.1009141), 2020-10-23
Supplement: pgen.1009141.s006.pdf [file pgen.1009141.s006.pdf]

| Model | Form        | $R^2_{\text{test}}$ | Size    |
|-------|-------------|---------------------|---------|
| (1)   | Lasso       | 0.1186              | 23,338  |
| (2)   | Elastic Net | 0.1287              | 97,012  |
| (3)   | Ridge       | <b>0.1299</b>       | 118,012 |
| (4)   | PRS-CS      | 0.0315              | 148,064 |
| (5)   | SBayesR     | 0.1251              | 667,057 |
| (6)   | P + T       | 0.0455              | 6,547   |
| (7)   | Clumping    | 0.0535              | 7,745   |
