# Supplementary material for: A fast and scalable framework for large-scale and ultrahigh-dimensional sparse regression with application to the UK Biobank
Source: PubMed Central journal article supplement (PMC7641476; doi:10.1371/journal.pgen.1009141), 2020-10-23
Supplement: pgen.1009141.s007.pdf [file pgen.1009141.s007.pdf]

| Model | Form                | AUC <sub>train</sub> | AUC <sub>val</sub> | AUC <sub>test</sub> | Size    |
|-------|---------------------|----------------------|--------------------|---------------------|---------|
| (1)   | Age + Sex           | 0.5293               | 0.5297             | 0.5320              | 2       |
| (2)   | Age + Sex + 10 PCs  | 0.5342               | 0.5344             | 0.5367              | 12      |
| (3)   | (2) + Single SNP    | 0.5463               | 0.5476             | 0.5454              | 13      |
| (4)   | (2) + 10K Combined  | 0.5783               | 0.5580             | 0.5531              | 10,012  |
| (5)   | (2) + 100K Combined | 0.6884               | 0.5644             | 0.5580              | 100,012 |
| (6)   | Sequential LR       | 0.6601               | 0.5883             | 0.5884              | 2,012   |
| (7)   | Lasso               | 0.7692               | 0.6159             | 0.6126              | 5,936   |
| (8)   | Relaxed Lasso       | 0.6747               | 0.5988             | 0.5955              | 621     |
| (9)   | Elastic Net         | 0.7803               | 0.6167             | <b>0.6131</b>       | 7,811   |
