# Supplementary material for: A fast and scalable framework for large-scale and ultrahigh-dimensional sparse regression with application to the UK Biobank
Source: PubMed Central journal article supplement (PMC7641476; doi:10.1371/journal.pgen.1009141), 2020-10-23
Supplement: pgen.1009141.s009.pdf [file pgen.1009141.s009.pdf]

| Model | Form                | AUC <sub>train</sub> | AUC <sub>val</sub> | AUC <sub>test</sub> | Size    |
|-------|---------------------|----------------------|--------------------|---------------------|---------|
| (1)   | Age + Sex           | 0.6918               | 0.6952             | 0.6883              | 2       |
| (2)   | Age + Sex + 10 PCs  | 0.6927               | 0.6959             | 0.6889              | 12      |
| (3)   | (2) + Single SNP    | 0.6963               | 0.6982             | 0.6921              | 13      |
| (4)   | (2) + 10K Combined  | 0.7402               | 0.6956             | 0.6880              | 10,012  |
| (5)   | (2) + 100K Combined | 0.8518               | 0.6607             | 0.6547              | 100,012 |
| (6)   | Sequential LR       | 0.7540               | 0.7167             | 0.7137              | 1,012   |
| (7)   | Lasso               | 0.7832               | 0.7259             | <b>0.7191</b>       | 4,277   |
| (8)   | Relaxed Lasso       | 0.7273               | 0.7220             | 0.7166              | 125     |
| (9)   | Elastic Net         | 0.7830               | 0.7259             | 0.7190              | 4,289   |
