# Supplementary material for: A fast and scalable framework for large-scale and ultrahigh-dimensional sparse regression with application to the UK Biobank
Source: PubMed Central journal article supplement (PMC7641476; doi:10.1371/journal.pgen.1009141), 2020-10-23
Supplement: pgen.1009141.s010.pdf [file pgen.1009141.s010.pdf]

| Model | Form        | AUC <sub>test</sub> | Size    |
|-------|-------------|---------------------|---------|
| (1)   | Lasso       | 0.7223              | 2,575   |
| (2)   | Elastic Net | 0.7222              | 2,585   |
| (3)   | Ridge       | 0.7139              | 40,012  |
| (4)   | PRS-CS      | 0.7027              | 148,064 |
| (5)   | SBayesR     | <b>0.7327</b>       | 667,057 |
| (6)   | P + T       | 0.7079              | 338     |
| (7)   | Clumping    | 0.7133              | 677     |
